# Supplementary material
Source: PubMed Central journal article supplement (PMC7025895)
Supplement: EMS85353-supplement-Supplementary_information.pdf [file EMS85353-supplement-Supplementary_information.pdf]

## Supplementary Information

### ECAC Collaborators

Amanda B. Spurdle<sup>1</sup>, Frederic Amant<sup>2</sup>, Daniela Annibaldi<sup>2</sup>, Katie Ashton<sup>3-5</sup>, John Attia<sup>3,6</sup>, Paul L. Auer<sup>7,8</sup>, Matthias W. Beckmann<sup>9</sup>, Amanda Black<sup>10</sup>, Louise Brinton<sup>10</sup>, Daniel D. Buchanan<sup>11-14</sup>, Stephen J. Chanock<sup>15</sup>, Chu Chen<sup>16</sup>, Maxine M. Chen<sup>17</sup>, Timothy H.T. Cheng<sup>18</sup>, Linda S. Cook<sup>19,20</sup>, Marta Crous-Bous<sup>17,21</sup>, Kamila Czene<sup>22</sup>, Immaculata De Vivo<sup>17,21</sup>, Joe Dennis<sup>23</sup>, Jeroen Depreeuw<sup>2,24,25</sup>, Thilo Dörk<sup>26</sup>, Sean C. Dowdy<sup>27</sup>, Alison M. Dunning<sup>28</sup>, Matthias Dürst<sup>29</sup>, Douglas F. Easton<sup>23,28</sup>, Arif B. Ekici<sup>30</sup>, Peter A. Fasching<sup>9,31</sup>, Brooke L. Fridley<sup>32</sup>, Christine M. Friedenreich<sup>20</sup>, Montserrat García-Closas<sup>15,33</sup>, Mia M. Gaudet<sup>34</sup>, Graham G. Giles<sup>12,35,36</sup>, Dylan M. Glubb<sup>1</sup>, Ellen L. Goode<sup>37</sup>, Maggie Gorman<sup>18</sup>, Christopher A. Haiman<sup>38</sup>, Per Hall<sup>22,39</sup>, Susan E. Hankinson<sup>21,40</sup>, Catherine S. Healey<sup>28</sup>, Alexander Hein<sup>9</sup>, Peter Hillemanns<sup>26</sup>, Shirley Hodgson<sup>41</sup>, Erling Hoivik<sup>42,43</sup>, Elizabeth G. Holliday<sup>3,6</sup>, David J. Hunter<sup>17,44,45</sup>, Angela Jones<sup>18</sup>, Peter Kraft<sup>17,44</sup>, Camilla Krakstad<sup>42,43</sup>, Diether Lambrechts<sup>25,46</sup>, Loic Le Marchand<sup>47</sup>, Xiaolin Liang<sup>48</sup>, Annika Lindblom<sup>49,50</sup>, Jolanta Lissowska<sup>51</sup>, Jirong Long<sup>52</sup>, Lingeng Lu<sup>53</sup>, Anthony M. Magliocco<sup>54</sup>, Lynn Martin<sup>55</sup>, Mark McEvoy<sup>6</sup>, Roger L. Milne<sup>12,35,36</sup>, Miriam Mints<sup>56</sup>, Rami Nassir<sup>57</sup>, Irene Orlow<sup>48</sup>, Geoffrey Otton<sup>58</sup>, Claire Palles<sup>18</sup>, Paul D.P. Pharoah<sup>23,28</sup>, Loreall Pooler<sup>38</sup>, Jennifer Prescott<sup>21</sup>, Tony Proietto<sup>58</sup>, Timothy R. Rebbeck<sup>59,60</sup>, Stefan P. Renner<sup>61</sup>, Harvey A. Risch<sup>53</sup>, Matthias Rübner<sup>61</sup>, Ingo Runnebaum<sup>29</sup>, Carlotta Sacerdote<sup>62,63</sup>, Gloria E. Sarto<sup>64</sup>, Fredrick Schumacher<sup>65</sup>, Rodney J. Scott<sup>3,5,66</sup>, V. Wendy Setiawan<sup>38</sup>, Mitul Shah<sup>28</sup>, Xin Sheng<sup>38</sup>, Xiao-Ou Shu<sup>52</sup>, Melissa C. Southey<sup>11,36,67</sup>, Emma Tham<sup>49,68</sup>, Ian Tomlinson<sup>18,55</sup>, Jone Trovik<sup>42,43</sup>, Constance Turman<sup>17</sup>, David Van Den Berg<sup>38</sup>, Adriaan Vanderstichele<sup>69</sup>, Zhaoming Wang<sup>10</sup>, Penelope M. Webb<sup>70</sup>, Nicolas Wentzensen<sup>10</sup>, Stacey J. Winham<sup>71</sup>, Lucy Xia<sup>38</sup>, Yong-Bing Xiang<sup>72</sup>, Hannah P. Yang<sup>10</sup>, Herbert Yu<sup>47</sup>, Wei Zheng<sup>52</sup>

<sup>1</sup> Department of Genetics and Computational Biology, QIMR Berghofer Medical Research Institute, Brisbane, Queensland, Australia.

<sup>2</sup> Department of Obstetrics and Gynecology, Division of Gynecologic Oncology, University Hospitals KU Leuven, University of Leuven, Leuven, Belgium.

<sup>3</sup> Hunter Medical Research Institute, John Hunter Hospital, Newcastle, New South Wales, Australia.

<sup>4</sup> Centre for Information Based Medicine, University of Newcastle, Callaghan, New South Wales, Australia.

<sup>5</sup> Discipline of Medical Genetics, School of Biomedical Sciences and Pharmacy, Faculty of Health, University of Newcastle, Callaghan, New South Wales, Australia.

<sup>6</sup> Centre for Clinical Epidemiology and Biostatistics, School of Medicine and Public Health, University of Newcastle, Callaghan, New South Wales, Australia.

<sup>7</sup> Cancer Prevention Program, Fred Hutchinson Cancer Research Center, Seattle, WA, USA.

<sup>8</sup> Zilber School of Public Health, University of Wisconsin-Milwaukee, Milwaukee, WI, USA.

<sup>9</sup> Department of Gynecology and Obstetrics, Comprehensive Cancer Center ER-EMN, University Hospital Erlangen, Friedrich-Alexander-University Erlangen-Nuremberg, Erlangen, Germany.

<sup>10</sup> Division of Cancer Epidemiology and Genetics, National Cancer Institute, Bethesda, MD, USA.

<sup>11</sup> Department of Clinical Pathology, The University of Melbourne, Melbourne, Victoria, Australia.

<sup>12</sup> Centre for Epidemiology and Biostatistics, Melbourne School of Population and Global Health, The University of Melbourne, Melbourne, Victoria, Australia.

<sup>13</sup> Genomic Medicine and Family Cancer Clinic, Royal Melbourne Hospital, Parkville, Victoria, Australia.

- <sup>14</sup> University of Melbourne Centre for Cancer Research, Victorian Comprehensive Cancer Centre, Parkville, Victoria, Australia.
- <sup>15</sup> Division of Cancer Epidemiology and Genetics, National Cancer Institute, National Institutes of Health, Department of Health and Human Services, Bethesda, MD, USA.
- <sup>16</sup> Epidemiology Program, Fred Hutchinson Cancer Research Center, Seattle, WA, USA.
- <sup>17</sup> Department of Epidemiology, Harvard T.H. Chan School of Public Health, Boston, MA, USA.
- <sup>18</sup> Wellcome Trust Centre for Human Genetics and Oxford NIHR Biomedical Research Centre, University of Oxford, Oxford, UK.
- <sup>19</sup> University of New Mexico Health Sciences Center, University of New Mexico, Albuquerque, NM, USA.
- <sup>20</sup> Department of Cancer Epidemiology and Prevention Research, Alberta Health Services, Calgary, AB, Canada.
- <sup>21</sup> Channing Division of Network Medicine, Department of Medicine, Brigham and Women's Hospital and Harvard Medical School, Boston, MA, USA.
- <sup>22</sup> Department of Medical Epidemiology and Biostatistics, Karolinska Institutet, Stockholm, Sweden.
- <sup>23</sup> Centre for Cancer Genetic Epidemiology, Department of Public Health and Primary Care, University of Cambridge, Cambridge, UK.
- <sup>24</sup> Vesalius Research Center, VIB, Leuven, Belgium.
- <sup>25</sup> Laboratory for Translational Genetics, Department of Human Genetics, University of Leuven, Leuven, Belgium.
- <sup>26</sup> Gynaecology Research Unit, Hannover Medical School, Hannover, Germany.
- <sup>27</sup> Department of Obstetrics and Gynecology, Division of Gynecologic Oncology, Mayo Clinic, Rochester, MN, USA.
- <sup>28</sup> Centre for Cancer Genetic Epidemiology, Department of Oncology, University of Cambridge, Cambridge, UK.
- <sup>29</sup> Department of Gynaecology, Jena University Hospital - Friedrich Schiller University, Jena, Germany.
- <sup>30</sup> Institute of Human Genetics, University Hospital Erlangen, Friedrich-Alexander University Erlangen-Nuremberg, Comprehensive Cancer Center Erlangen-EMN, Erlangen, Germany.
- <sup>31</sup> David Geffen School of Medicine, Department of Medicine Division of Hematology and Oncology, University of California at Los Angeles, Los Angeles, CA, USA.
- <sup>32</sup> Department of Biostatistics, Kansas University Medical Center, Kansas City, KS, USA.
- <sup>33</sup> Division of Genetics and Epidemiology, Institute of Cancer Research, London, UK.
- <sup>34</sup> Behavioral and Epidemiology Research Group, American Cancer Society, Atlanta, GA, USA.
- <sup>35</sup> Cancer Epidemiology Division, Cancer Council Victoria, Melbourne, Victoria, Australia.
- <sup>36</sup> Precision Medicine, School of Clinical Sciences at Monash Health, Monash University, Clayton, Victoria, Australia.
- <sup>37</sup> Department of Health Science Research, Division of Epidemiology, Mayo Clinic, Rochester, MN, USA.
- <sup>38</sup> Department of Preventive Medicine, Keck School of Medicine, University of Southern California, Los Angeles, CA, USA.
- <sup>39</sup> Department of Oncology, Södersjukhuset, Stockholm, Sweden.
- <sup>40</sup> Department of Biostatistics & Epidemiology, University of Massachusetts, Amherst, Amherst, MA, USA.
- <sup>41</sup> Department of Clinical Genetics, St George's, University of London, London, UK.
- <sup>42</sup> Centre for Cancer Biomarkers CCBIO, Department of Clinical Science, University of Bergen, Bergen, Norway.
- <sup>43</sup> Department of Obstetrics and Gynecology, Haukeland University Hospital, Bergen, Norway.
- <sup>44</sup> Program in Genetic Epidemiology and Statistical Genetics, Harvard T.H. Chan School of Public Health, Boston, MA, USA.
- <sup>45</sup> Nuffield Department of Population Health, University of Oxford, Oxford, UK.

- <sup>46</sup> VIB Center for Cancer Biology, Leuven, Belgium.
- <sup>47</sup> Epidemiology Program, University of Hawaii Cancer Center, Honolulu, HI, USA.
- <sup>48</sup> Department of Epidemiology and Biostatistics, Memorial Sloan-Kettering Cancer Center, New York, NY, USA.
- <sup>49</sup> Department of Molecular Medicine and Surgery, Karolinska Institutet, Stockholm, Sweden.
- <sup>50</sup> Department of Clinical Genetics, Karolinska University Hospital, Stockholm, Sweden.
- <sup>51</sup> Department of Cancer Epidemiology and Prevention, M. Sklodowska-Curie Cancer Center, Oncology Institute, Warsaw, Poland.
- <sup>52</sup> Division of Epidemiology, Department of Medicine, Vanderbilt Epidemiology Center, Vanderbilt-Ingram Cancer Center, Vanderbilt University School of Medicine, Nashville, TN, USA.
- <sup>53</sup> Chronic Disease Epidemiology, Yale School of Medicine, New Haven, CT, USA.
- <sup>54</sup> Department of Anatomic Pathology, Moffitt Cancer Center & Research Institute, Tampa, FL, USA.
- <sup>55</sup> Institute of Cancer and Genomic Sciences, University of Birmingham, Birmingham, UK.
- <sup>56</sup> Department of Women's and Children's Health, Karolinska Institutet, Stockholm, Sweden.
- <sup>57</sup> Department of Biochemistry and Molecular Medicine, University of California Davis, Davis, CA, USA.
- <sup>58</sup> School of Medicine and Public Health, University of Newcastle, Callaghan, New South Wales, Australia.
- <sup>59</sup> Harvard T.H. Chan School of Public Health, Boston, MA, USA.
- <sup>60</sup> Dana-Farber Cancer Institute, Boston, MA, USA.
- <sup>61</sup> Department of Gynaecology and Obstetrics, University Hospital Erlangen, Friedrich-Alexander University Erlangen-Nuremberg, Comprehensive Cancer Center Erlangen-EMN, Erlangen, Germany.
- <sup>62</sup> Center for Cancer Prevention (CPO-Peimonte), Turin, Italy.
- <sup>63</sup> Human Genetics Foundation (HuGeF), Turino, Italy.
- <sup>64</sup> Department of Obstetrics and Gynecology, School of Medicine and Public Health, University of Wisconsin, Madison, WI, USA.
- <sup>65</sup> Department of Population and Quantitative Health Sciences, Case Western Reserve University, Cleveland, OH, USA.
- <sup>66</sup> Division of Molecular Medicine, Pathology North, John Hunter Hospital, Newcastle, New South Wales, Australia.
- <sup>67</sup> Cancer Epidemiology Division, Cancer Council Victoria, Melbourne, Victoria, Australia.
- <sup>68</sup> Clinical Genetics, Karolinska Institutet, Stockholm, Sweden.
- <sup>69</sup> Division of Gynecologic Oncology, Department of Obstetrics and Gynaecology and Leuven Cancer Institute, University Hospitals Leuven, Leuven, Belgium.
- <sup>70</sup> Population Health Department, QIMR Berghofer Medical Research Institute, Brisbane, Queensland, Australia.
- <sup>71</sup> Department of Health Science Research, Division of Biomedical Statistics and Informatics, Mayo Clinic, Rochester, MN, USA.
- <sup>72</sup> State Key Laboratory of Oncogene and Related Genes & Department of Epidemiology, Shanghai Cancer Institute, Renji Hospital, Shanghai Jiaotong University School of Medicine, Shanghai, China.
